# Supplementary material
Source: publisher figshare collection journal article supplement (https://acs.figshare.com/ndownloader/files/4445851)
Supplement: Supplementary file 1 [file 4445851]

# Photoelectrochemical Stability of Electrodeposited Cu<sub>2</sub>O Films

*Lingling Wu<sup>a</sup>, Lok-kun Tsui<sup>b</sup>, Nathan Swami<sup>a</sup>, Giovanni Zangari<sup>b</sup>*

<sup>a</sup>Department of Electrical Engineering, 351 McCormick Road, PO Box 400743, University of Virginia,  
Charlottesville, VA 22904

<sup>b</sup>Department of Materials Science, 395 McCormick Road, PO Box 400745, University of Virginia,  
Charlottesville, VA 22904

AUTHOR EMAIL ADDRESS: gz3e@virginia.edu

CORRESPONDING AUTHOR: Giovanni Zangari

Office Phone: +1 434-243-5474

Fax Phone: +1 434-982-5799

## Supporting information

Electrochemical assaying of the concentration of  $\text{Cu}^{2+}$  ions in various sulfate/acetate/methanol solutions was performed to assess the extent of  $\text{Cu}_2\text{O}$  dissolution upon photocurrent measurements. LSVs were collected from  $0\text{V}_{\text{SCE}}$  to  $-1.5\text{V}_{\text{SCE}}$  with a scan rate of  $0.01\text{V/s}$  in (i) a fresh solution, (ii) a fresh solution with  $2\text{mM}$   $\text{CuSO}_4$  added, and (iii) a used solution after a total of 105 cycles. The working electrodes were the same Au-Si substrates used for  $\text{Cu}_2\text{O}$  electrodeposition and had an area of  $0.25\text{ cm}^2$ . All experiments were done under ambient room illumination in the same quartz cuvette containing  $15\text{mL}$  of solution as in the photocurrent measurements. In the solution containing  $2\text{mM}$   $\text{CuSO}_4$ , a peak is present at  $-0.07\text{V}_{\text{SCE}}$  that is not observed in the other two solutions. Neither the used nor the fresh solution exhibit the peak present in the  $2\text{mM}$   $\text{CuSO}_4$  solution, suggesting that the used solution should have a negligible  $\text{Cu}^{2+}$  ion concentration. We therefore conclude that dissolution of  $\text{Cu}_2\text{O}$  did not take place during cyclic polarization in the  $-0.5\text{V}_{\text{SCE}}$  to  $0.5\text{V}_{\text{SCE}}$  interval.

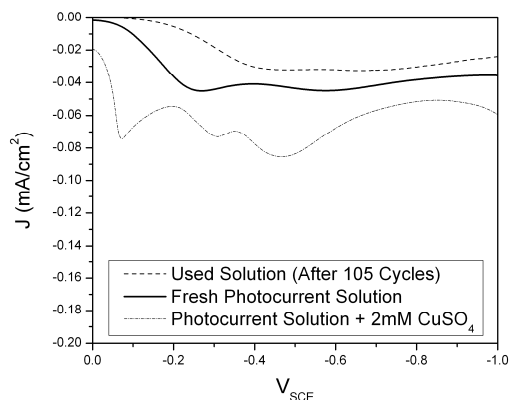

**Figure 1.** LSVs on Au substrates were taken in a used solution after 105 cycles, the fresh photocurrent solution, and a fresh photocurrent solution with  $2\text{mM}$   $\text{CuSO}_4$ .
